# Supplementary material for: The structure of 5-cyanoindole in the ground and the lowest electronically excited singlet states, deduced from rotationally resolved electronic spectroscopy and ab initio theory
Source: Royal Society of Chemistry journal article supplement (doi:10.1039/c2cp41094j), 2012-01-01
Supplement: c2cp41094j.pdf [file c2cp41094j.pdf]

## Supporting Online Material

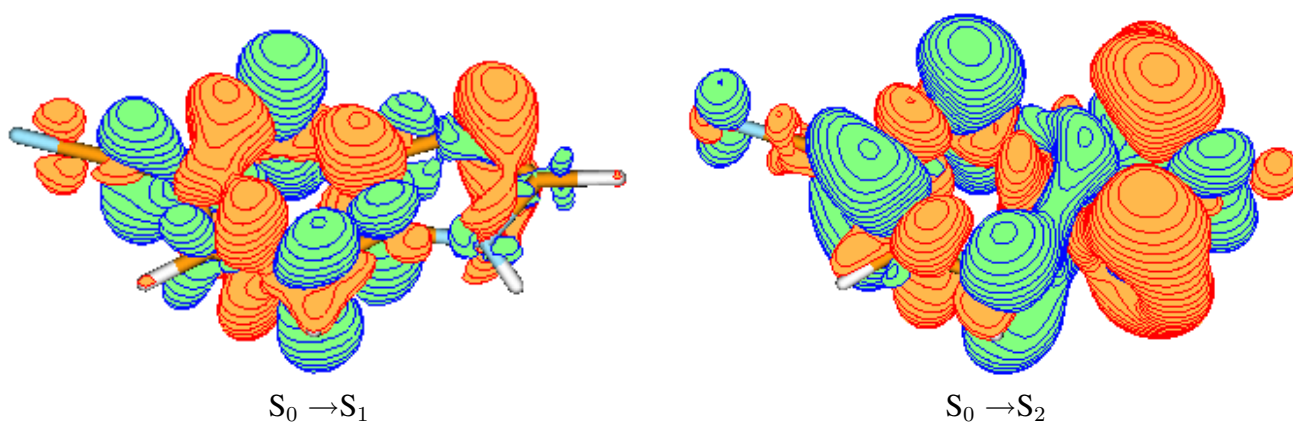

Figure S1: Isosurface plots of the density changes for the excitations to the  $S_1$  and  $S_2$  states from the SCS-CC2/cc-pVTZ calculations, isosurface value 0.001.

Table S1: B3-LYP/cc-pVTZ calculated optimized  $S_0$  cartesian coordinates of 5CI (in bohr).

|   |             |             |             |
|---|-------------|-------------|-------------|
| c | 2.33945506  | -3.45666728 | -0.06658526 |
| c | 1.27758598  | -0.96529945 | -0.00746652 |
| c | -1.39128359 | -1.25172758 | -0.06878124 |
| n | -1.88418188 | -3.79426572 | -0.15945308 |
| c | 0.36744358  | -5.11258413 | -0.15768127 |
| c | 2.30066152  | 1.46262037  | 0.09063558  |
| c | 0.67194214  | 3.52928432  | 0.12554779  |
| c | -1.97971352 | 3.19668763  | 0.06173556  |
| c | -3.02957847 | 0.81302010  | -0.03550986 |
| c | 1.68232260  | 6.03072950  | 0.23184740  |
| n | 2.49030247  | 8.05337799  | 0.32241414  |
| h | 4.31287105  | -3.94921688 | -0.04395390 |
| h | 0.37172822  | -7.14615943 | -0.22234068 |
| h | -3.61004990 | -4.57988505 | -0.21756163 |
| h | 4.32226751  | 1.75508990  | 0.13982414  |
| h | -5.05904804 | 0.56889883  | -0.08351262 |
| h | -3.18272473 | 4.84609688  | 0.09084145  |

Table S2: CC2/cc-pVTZ calculated optimized  $S_0$  cartesian coordinates of 5CI (in bohr).

|   |             |             |             |
|---|-------------|-------------|-------------|
| c | 2.34866071  | -3.45461961 | -0.06573146 |
| c | 1.28588288  | -0.97298158 | -0.00621903 |
| c | -1.39162059 | -1.25666760 | -0.06905693 |
| n | -1.88641656 | -3.80029826 | -0.16206036 |
| c | 0.35993795  | -5.12372640 | -0.15974757 |
| c | 2.31426076  | 1.46331070  | 0.09373932  |
| c | 0.67074549  | 3.52440059  | 0.12816663  |
| c | -1.98471158 | 3.19916416  | 0.06435097  |
| c | -3.04143246 | 0.80551644  | -0.03491131 |
| c | 1.67858227  | 6.02946434  | 0.23040246  |
| n | 2.50391614  | 8.10273261  | 0.31498826  |
| h | 4.32141862  | -3.95276763 | -0.04256228 |
| h | 0.35749085  | -7.15832311 | -0.22588515 |
| h | -3.61777002 | -4.58336081 | -0.22039897 |
| h | 4.33653914  | 1.76470859  | 0.14398175  |
| h | -5.07141596 | 0.56034515  | -0.08349399 |
| h | -3.18406763 | 4.85310243  | 0.09443765  |

Table S3: SCS-CC2/cc-pVTZ calculated optimized  $S_0$  cartesian coordinates of 5CI (in bohr).

|   |             |             |             |
|---|-------------|-------------|-------------|
| c | 2.35019781  | -3.46398276 | -0.06583061 |
| c | 1.28135652  | -0.97281537 | -0.00578832 |
| c | -1.38961411 | -1.25884087 | -0.06860637 |
| n | -1.89043978 | -3.80593228 | -0.16184733 |
| c | 0.36301331  | -5.13025296 | -0.16013315 |
| c | 2.31302511  | 1.46736094  | 0.09439528  |
| c | 0.67241128  | 3.52912870  | 0.12867474  |
| c | -1.98699674 | 3.20244899  | 0.06483292  |
| c | -3.04346320 | 0.80888173  | -0.03428126 |
| c | 1.68504998  | 6.04595455  | 0.23055902  |
| n | 2.50559442  | 8.11020028  | 0.31366763  |
| h | 4.32368942  | -3.96057592 | -0.04256695 |
| h | 0.36148410  | -7.16517968 | -0.22675658 |
| h | -3.61968003 | -4.58790024 | -0.22239344 |
| h | 4.33593391  | 1.76399170  | 0.14448228  |
| h | -5.07329575 | 0.56211543  | -0.08298895 |
| h | -3.18826627 | 4.85539776  | 0.09458110  |

Table S4: SOS-CC2/cc-pVTZ calculated optimized  $S_0$  cartesian coordinates of 5CI (in bohr).

|   |             |             |             |
|---|-------------|-------------|-------------|
| c | 2.35102810  | -3.46904980 | -0.06604163 |
| c | 1.27902081  | -0.97274404 | -0.00620427 |
| c | -1.38846243 | -1.25996994 | -0.06890684 |
| n | -1.89247812 | -3.80885041 | -0.16198615 |
| c | 0.36476636  | -5.13390410 | -0.16001384 |
| c | 2.31233792  | 1.46958771  | 0.09405537  |
| c | 0.67338194  | 3.53168923  | 0.12857275  |
| c | -1.98841842 | 3.20406912  | 0.06472837  |
| c | -3.04456502 | 0.81075712  | -0.03447609 |
| c | 1.68841242  | 6.05430446  | 0.23111756  |
| n | 2.50671476  | 8.11433835  | 0.31466840  |
| h | 4.32497993  | -3.96481052 | -0.04264033 |
| h | 0.36354001  | -7.16907279 | -0.22632140 |
| h | -3.62084748 | -4.59020965 | -0.22211651 |
| h | 4.33562386  | 1.76406254  | 0.14405859  |
| h | -5.07440541 | 0.56318085  | -0.08312208 |
| h | -3.19062924 | 4.85662187  | 0.09462809  |

Table S5: TD B3-LYP/cc-pVTZ calculated optimized  $S_1$  cartesian coordinates of 5CI (in bohr).

|   |             |             |             |
|---|-------------|-------------|-------------|
| c | 2.31357707  | -3.43231040 | -0.06596908 |
| c | 1.27578852  | -0.94146559 | -0.00652449 |
| c | -1.33482974 | -1.23814460 | -0.06797896 |
| n | -1.86432685 | -3.88163417 | -0.16245019 |
| c | 0.26806961  | -5.19358398 | -0.16258137 |
| c | 2.40425058  | 1.47170395  | 0.09411758  |
| c | 0.69997771  | 3.61381750  | 0.13136188  |
| c | -1.93478521 | 3.20232448  | 0.06469666  |
| c | -3.03984999 | 0.81054241  | -0.03575725 |
| c | 1.61725269  | 6.10762535  | 0.23372599  |
| n | 2.41076371  | 8.15620458  | 0.31925587  |
| h | 4.28088074  | -3.95684469 | -0.04404838 |
| h | 0.31035691  | -7.22566512 | -0.22691714 |
| h | -3.60981466 | -4.63725253 | -0.22124075 |
| h | 4.42378165  | 1.72702484  | 0.14086329  |
| h | -5.06540963 | 0.57513465  | -0.08413035 |
| h | -3.15568311 | 4.84252333  | 0.09357669  |

Table S6: CC2/cc-pVTZ calculated optimized  $S_1$  cartesian coordinates of 5CI (in bohr).

|   |             |             |             |
|---|-------------|-------------|-------------|
| c | 2.31585845  | -3.41484509 | -0.06490768 |
| c | 1.30577360  | -0.96042241 | -0.00504083 |
| c | -1.36970026 | -1.25659061 | -0.06827680 |
| n | -1.88727595 | -3.88212253 | -0.16431213 |
| c | 0.27520815  | -5.18176957 | -0.16341134 |
| c | 2.43378690  | 1.47064612  | 0.09679913  |
| c | 0.72457486  | 3.60116087  | 0.13189270  |
| c | -1.95198092 | 3.20005606  | 0.06511778  |
| c | -3.07385379 | 0.78845848  | -0.03586216 |
| c | 1.63673208  | 6.09790242  | 0.23147970  |
| n | 2.42216473  | 8.20364841  | 0.31582232  |
| h | 4.28583748  | -3.94260095 | -0.04272687 |
| h | 0.31785691  | -7.21668471 | -0.22891149 |
| h | -3.63112979 | -4.65002493 | -0.22423454 |
| h | 4.45801202  | 1.72834672  | 0.14583851  |
| h | -5.10262265 | 0.56261114  | -0.08389526 |
| h | -3.15924181 | 4.85223060  | 0.09462895  |

Table S7: SCS-CC2/cc-pVTZ calculated optimized  $S_1$  cartesian coordinates of 5CI (in bohr).

|   |             |             |             |
|---|-------------|-------------|-------------|
| c | 2.34807092  | -3.45121350 | -0.06567041 |
| c | 1.31745932  | -0.98607006 | -0.00698208 |
| c | -1.42925839 | -1.27098536 | -0.07067684 |
| n | -1.90275426 | -3.83626947 | -0.16247871 |
| c | 0.34811237  | -5.16343948 | -0.16031102 |
| c | 2.41402094  | 1.45822464  | 0.09393837  |
| c | 0.70538740  | 3.58187038  | 0.12996315  |
| c | -2.00778801 | 3.23347115  | 0.06409216  |
| c | -3.10968351 | 0.78973714  | -0.03755976 |
| c | 1.67494416  | 6.07294292  | 0.23293712  |
| n | 2.48621201  | 8.15247905  | 0.31986988  |
| h | 4.32112387  | -3.95620480 | -0.04261124 |
| h | 0.36191796  | -7.19766887 | -0.22525079 |
| h | -3.62911603 | -4.62778158 | -0.22186540 |
| h | 4.43380807  | 1.74901566  | 0.14363946  |
| h | -5.13799148 | 0.55595816  | -0.08572679 |
| h | -3.19446532 | 4.89593403  | 0.09469290  |

Table S8: SOS-CC2/cc-pVTZ calculated optimized  $S_1$  cartesian coordinates of 5CI (in bohr).

|   |             |             |             |
|---|-------------|-------------|-------------|
| c | 2.35226942  | -3.46239233 | -0.06573919 |
| c | 1.31812857  | -0.98841405 | -0.00598642 |
| c | -1.43226280 | -1.27175836 | -0.07042719 |
| n | -1.90339558 | -3.83208549 | -0.16319968 |
| c | 0.35766589  | -5.16696185 | -0.16115348 |
| c | 2.41190269  | 1.45852425  | 0.09603533  |
| c | 0.69850358  | 3.58134896  | 0.13080435  |
| c | -2.01266968 | 3.24104174  | 0.06549913  |
| c | -3.11513747 | 0.79065788  | -0.03678312 |
| c | 1.67815665  | 6.07879570  | 0.23147273  |
| n | 2.49391618  | 8.14979937  | 0.31502987  |
| h | 4.32582519  | -3.96532381 | -0.04262314 |
| h | 0.36645777  | -7.20107419 | -0.22706635 |
| h | -3.62872758 | -4.62351533 | -0.22352907 |
| h | 4.43096484  | 1.75341044  | 0.14662323  |
| h | -5.14307438 | 0.55417524  | -0.08532347 |
| h | -3.19852329 | 4.90377184  | 0.09636648  |

Table S9: SCS-CC2/cc-pVTZ calculated optimized  $S_2$  cartesian coordinates of 5CI (in bohr).

|   |            |            |            |
|---|------------|------------|------------|
| c | 1.2410487  | -1.8388334 | -0.0350051 |
| c | 0.6970113  | -0.5115760 | -0.0023882 |
| c | -0.7171235 | -0.6468323 | -0.0352273 |
| n | -0.9721944 | -2.0166550 | -0.0852949 |
| c | 0.1686789  | -2.7682496 | -0.0870437 |
| c | 1.2647933  | 0.7835091  | 0.0514377  |
| c | 0.3300143  | 1.8937713  | 0.0685636  |
| c | -1.0466920 | 1.7243175  | 0.0353670  |
| c | -1.6284286 | 0.4077290  | -0.0190492 |
| c | 0.8633120  | 3.2192908  | 0.1218805  |
| n | 1.3282576  | 4.3020695  | 0.1658065  |
| h | 2.2857520  | -2.1086299 | -0.0229029 |
| h | 0.1470518  | -3.8424047 | -0.1227854 |
| h | -1.9058414 | -2.4069084 | -0.1168937 |
| h | 2.3303580  | 0.9571404  | 0.0784388  |
| h | -2.6984262 | 0.2575186  | -0.0454691 |
| h | -1.6875719 | 2.5947432  | 0.0505655  |

Table S10: SOS-CC2/cc-pVTZ calculated optimized  $S_2$  cartesian coordinates of 5CI (in bohr).

|   |            |            |            |
|---|------------|------------|------------|
| c | 1.2416001  | -1.8357107 | -0.0349116 |
| c | 0.6989162  | -0.5122907 | -0.0024090 |
| c | -0.7187272 | -0.6488737 | -0.0353441 |
| n | -0.9749239 | -2.0216711 | -0.0854678 |
| c | 0.1641626  | -2.7678644 | -0.0871156 |
| c | 1.2651374  | 0.7847714  | 0.0512860  |
| c | 0.3317399  | 1.8954735  | 0.0685831  |
| c | -1.0442140 | 1.7257604  | 0.0354217  |
| c | -1.6271748 | 0.4052765  | -0.0192046 |
| c | 0.8658013  | 3.2250174  | 0.1221988  |
| n | 1.3275542  | 4.3061124  | 0.1661573  |
| h | 2.2853360  | -2.1089267 | -0.0229618 |
| h | 0.1460917  | -3.8423888 | -0.1226017 |
| h | -1.9070397 | -2.4134770 | -0.1170485 |
| h | 2.3309092  | 0.9572736  | 0.0783753  |
| h | -2.6975700 | 0.2571653  | -0.0455793 |
| h | -1.6875992 | 2.5943525  | 0.0506219  |
